# Supplementary material
Source: HighWire-hosted journal article supplement (http://gut.bmjjournals.com/highwire/filestream/193032/field_highwire_adjunct_files/9/Tsilingiri_et._al._Sup._Fig._9.pdf)
Supplement: Tsilingiri_et._al._Sup._Fig._9.pdf [file Tsilingiri_et._al._Sup._Fig._9.pdf]

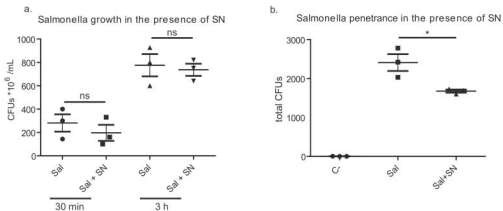

Supplementary Figure 9. *Lactobacillus paracasei* SN does not affect *Salmonella* proliferation but renders it less invasive.

a.  $4 \times 10^7$  CFUs of *Salmonella* (OD=0.6) were cultured in tissue culture medium in the presence or absence of the SN (5%). Dilutions were plated after 30 min and 3 h of culture and the number of CFUs/mL calculated.

b. Tissues were stimulated with *Salmonella* in the presence or absence of the SN for 1,5 h. Tissues were then treated with gentamycin for a further hour to kill extramucosal *Salmonella*, lysed and plated to evaluate CFUs. Symbols show total CFUs of internalized *Salmonella*.

Each symbol represents an individual experiment. Error bars represent SEM from three different experiments.

Significance was determined by Wilcoxon test.
